# Supplementary material for: Hunting of roe deer and wild boar in Germany: Is non-lead ammunition suitable for hunting?
Source: PubMed Central journal article supplement (PMC5605046; doi:10.1371/journal.pone.0185029), 2017-09-19
Supplement: pone.0185029.s001.pdf [file pone.0185029.s001.pdf]

| Variable                                  | Description                                                                                                                                                                    | Unit  | Measurement Scales |
|-------------------------------------------|--------------------------------------------------------------------------------------------------------------------------------------------------------------------------------|-------|--------------------|
| Escape distance                           | in 10 m classes, subjective evaluation by hunters                                                                                                                              | meter | Interval scale     |
| Bullet material                           | 1 non-lead<br>2 lead                                                                                                                                                           | -     | Dichotomous        |
| Bullet construction                       | 1 mass loss expected in the target media (fragmenting projectiles / partial fragmenting projectiles)<br>2 mass loss not expected in the target media (deformation projectiles) | -     | Dichotomous        |
| Location of shoot placement (entry wound) | 1 thorax (chest) cavity<br>2 gastrointestinal tract (stomach, gut)<br>3 haunch<br>4 head<br>5 neck<br>6 forelegs                                                               | -     | Categorical        |
| Hunting method                            | 1 stalking<br>2 hunting from hides<br>3 drive hunting                                                                                                                          | -     | Categorical        |
| Age of game                               | 1 juvenile (<1)<br>2 subadult (1-< 2)<br>3 adult (from 2)                                                                                                                      | years | Ordinal            |
| Shooting distance                         | Subjective evaluation by hunters                                                                                                                                               | meter | Continuous         |
| Bone hit                                  | 1 no<br>2 yes                                                                                                                                                                  | -     | Dichotomous        |
| Subsequent search                         | 1 no<br>2 yes                                                                                                                                                                  | -     | Dichotomous        |
| Sex of game                               | 1 female<br>2 male                                                                                                                                                             | -     | Dichotomous        |
